# Supplementary material for: Urban versus Rural Residence and Outcomes in Older Patients with Breast Cancer
Source: Oxford University Press journal article supplement (doi:10.1158/1055-9965.epi-19-1414), 2020-04-16
Supplement: 10559965epi191414-sup-232303_3_supp_6220186_q8jj0w.docx [file 10559965epi191414-sup-232303_3_supp_6220186_q8jj0w.docx]

**Supplementary Table 2. Five-year overall survival from diagnosis by breast cancer stage**

| **Stage 0** | **Overall 5y survival** | **p** | **Overall 5y survival including SMN at endpoint** | **p** |
| --- | --- | --- | --- | --- |
| Urban | 86% | 0.129* | 81% | 0.943* |
| Rural | 85% |  | 81% |  |
|  |  |  |  |  |
| High-income | 87% | <0.001 | 82% | <0.001 |
| Middle-income | 85% |  | 80% |  |
| Low-income | 83% |  | 78% |  |
|  |  |  |  |  |
| Urban/high-income | 87% | <0.001* | 82% | <0.001* |
| Urban/middle-income | 85% |  | 80% |  |
| Urban/low-income | 83% |  | 76.7% |  |
| Rural/high-income | 87% |  | 82% |  |
| Rural/middle-income | 85% |  | 79.5% |  |
| Rural/low-income | 84% |  | 81% |  |
|  |  |  |  |  |
| **Stage I-II** |  |  |  |  |
| Urban | 77% | 0.009* | 73% | 0.010* |
| Rural | 75% |  | 71.6% |  |
|  |  |  |  |  |
| High-income | 79% | <0.001 | 75% | <0.001 |
| Middle-income | 75% |  | 71% |  |
| Low-income | 72% |  | 68% |  |
|  |  |  |  |  |
| Urban/high-income | 79% | <0.001* | 75% | 0.559* |
| Urban/middle-income | 75% |  | 71.2% |  |
| Urban/low-income | 71% |  | 67.5% |  |
| Rural/high-income | 78% |  | 75% |  |
| Rural/middle-income | 74% |  | 70% |  |
| Rural/low-income | 73% |  | 70.5% |  |
|  |  |  |  |  |
| **Stage III** |  |  |  |  |
| Urban | 60% | <0.001* | 57.4% | <0.001* |
| Rural | 58% |  | 53.0% |  |
|  |  |  |  |  |
| High-income | 63% | <0.001* | 60% | <0.001* |
| Middle-income | 58% |  | 55% |  |
| Low-income | 53% |  | 50% |  |
|  |  |  |  |  |
| Urban/high-income | 63% | <0.001* | 60% | <0.001* |
| Urban/middle-income | 58% |  | 56% |  |
| Urban/low-income | 52% |  | 50% |  |
| Rural/high-income | 63% |  | 57% |  |
| Rural/middle-income | 56% |  | 54% |  |
| Rural/low-income | 55% |  | 49% |  |
|  |  |  |  |  |
| **Stage IV** |  |  |  |  |
| Urban | 14% | 0.114* | 12.5% | 0.667* |
| Rural | 12% |  | 13% |  |
|  |  |  |  |  |
| High-income | 16% | 0.353* | 14.2% | <0.001* |
| Middle-income | 12% |  | 11.7% |  |
| Low-income | 8.5% |  | 9.7% |  |
|  |  |  |  |  |
| Urban/high-income | 16% | <0.001* | 14% | <0.001* |
| Urban/middle-income | 12% |  | 11.5% |  |
| Urban/low-income | 8% |  | 9.3% |  |
| Rural/high-income | 16% |  | 16.6% |  |
| Rural/middle-income | 11% |  | 12.4 |  |
| Rural/low-income | 10% |  | 11.3 |  |

**p-values represent overall significant difference*
