# Supplementary material for: Urban versus Rural Residence and Outcomes in Older Patients with Breast Cancer
Source: Oxford University Press journal article supplement (doi:10.1158/1055-9965.epi-19-1414), 2020-04-16
Supplement: 10559965epi191414-sup-232303_3_supp_6220191_q8jj0w.docx [file 10559965epi191414-sup-232303_3_supp_6220191_q8jj0w.docx]

**Supplementary Table 5 Relative rate of healthcare utilization with Subsequent Malignant Neoplasm (SMN) as an endpoint from year 2 to 5.**

|  | PCP | Oncology | Non-oncology | Hospitalization | ED |
| --- | --- | --- | --- | --- | --- |
|  | IRR (95% CI) | IRR (95% CI) | IRR (95% CI) | IRR (95% CI) | IRR (95% CI) |
| Urban-high income (ref) |  |  |  |  |  |
| Urban-middle income | 1.03 (1.02,1.04) | 1.01 (0.98,1.04) | 0.90 (0.89,0.91) | 1.06 (1.04,1.09) | 1.07 (1.01,1.13) |
| Urban-low income | 1.05 (1.04,1.07) | 1.02 (0.98,1.06) | 0.85 (0.83,0.86) | 1.13 (1.10,1.17) | 1.13 (1.05,1.22) |
| Rural-high-income | 1.22 (1.18,1.25) | 0.94 (0.88,1.01) | 0.64 (0.62,0.66) | 0.76 (0.72,0.81) | 1.25 (1.12,1.41) |
| Rural-middle-income | 1.18 (1.15,1.21) | 1.03 (0.97,1.09) | 0.70 (0.68,0.72) | 0.95 (0.92,1.00) | 1.35 (1.23,1.48) |
| Rural-low-income | 1.20 (1.16,1.23) | 0.93 (0.87,0.99) | 0.71 (0.69,0.73) | 1.12 (1.07,1.18) | 1.25 (1.12,1.40) |
|  |  |  |  |  |  |
| Race/ethnicity |  |  |  |  |  |
| Non-Hispanic Black | 0.97 (0.95,0.99) | 1.19 (1.13,1.25) | 0.85 (0.83,0.87) | 1.26 (1.21,1.31) | 1.45 (1.33, 1.58) |
| Hispanic | 1.01 (0.98,1.04) | 0.99 (0.93,1.06) | 0.91 (0.89,0.94) | 0.99 (0.95,1.04) | 1.15 (1.04,1.29) |
| Asian | 0.98 (0.95, 1.01) | 1.04 (0.97,1.11) | 0.85 (0.83,0.88) | 0.68 (0.64,0.72) | 0.58 (0.50,0.68) |
| Other | 0.94 (0.85,1.03) | 1.00 (0.80,1.25) | 0.82 (0.74,0.90) | 0.93 (0.78,1.10) | 1.09 (0.74, 1.60) |
|  |  |  |  |  |  |
| Stage at diagnosis |  |  |  |  |  |
| Stage I-II | 0.97 (0.95,0.98) | 1.26 (1.22,1.31) | 0.94 (0.93,0.96) | 1.11 (1.08,1.14) | 1.03 (0.97,1.09) |
| Stage III | 0.89 (0.88, 0.91) | 1.93 (1.85,2.02) | 0.87 (0.86,0.89) | 1.27 (1.23,1.32) | 1.04 (0.96,1.12) |
| Stage IV | 0.64 (0.62,0.66) | 2.97 (2.77,3.19) | 0.78 (0.76,0.81) | 1.55 (1.46,1.64) | 0.80 (0.67,0.94) |
|  |  |  |  |  |  |
| Age at diagnosis |  |  |  |  |  |
| 71-75 | 1.09 (1.07,1.11) | 0.97 (0.94,1.00) | 1.02 (1.00,1.03) | 1.18 (1.15,1.22) | 1.05 (0.99,1.12) |
| 76-80 | 1.16 (1.14,1.18) | 0.83 (0.80,0.86) | 0.97 (0.95,0.98) | 1.39 (1.35,1.43) | 1.08 (1.02,1.15) |
| 80+ | 1.15 (1.13,1.17) | 0.55 (0.54,0.57) | 0.75 (0.74,0.76) | 1.59 (1.55,1.64) | 1.14 (1.07,1.21) |
|  |  |  |  |  |  |
| Elixhauser comorbidity index |  |  |  |  |  |
| 1 | 1.32 (1.31,1.34) | 0.95 (0.92,0.97) | 1.22 (1.20,1.23) | 1.39 (1.36,1.42) | 1.20 (1.15,1.27) |
| 2+ | 1.59 (1.57,1.61) | 0.86 (0.83,0.89) | 1.35 (1.33,1.37) | 2.45 (2.39,2.52) | 1.57 (1.48,1.66) |
|  |  |  |  |  |  |
| Surgery (ref=none ) |  |  |  |  |  |
| Partial mastectomy | 1.26 (1.23,1.29) | 1.33 (1.26, 1.41) | 1.47 (1.44,1.51) | 0.91 (0.87,0.95) | 1.15 (1.02,1.30) |
| Total mastectomy | 1.29 (1.26,1.32) | 1.05 (0.99, 1.11) | 1.37 (1.34,1.41) | 1.06 (1.01,1.11( | 1.17 (1.04,1.32) |
|  |  |  |  |  |  |
| Any chemotherapy (ref=no) |  |  |  |  |  |
| Yes | 1.05 (1.04,1.06) | 1.47 (1.43,1.50) | 1.24 (1.23,1.26) | 1.03 (1.01,1.05) | 1.13 (1.08,1.18) |
