# Supplementary figures and images for: Urban versus Rural Residence and Outcomes in Older Patients with Breast Cancer
Source: Oxford University Press journal article supplement (doi:10.1158/1055-9965.epi-19-1414), 2020-04-16

**Supplementary Figure 1: Sample Selection**


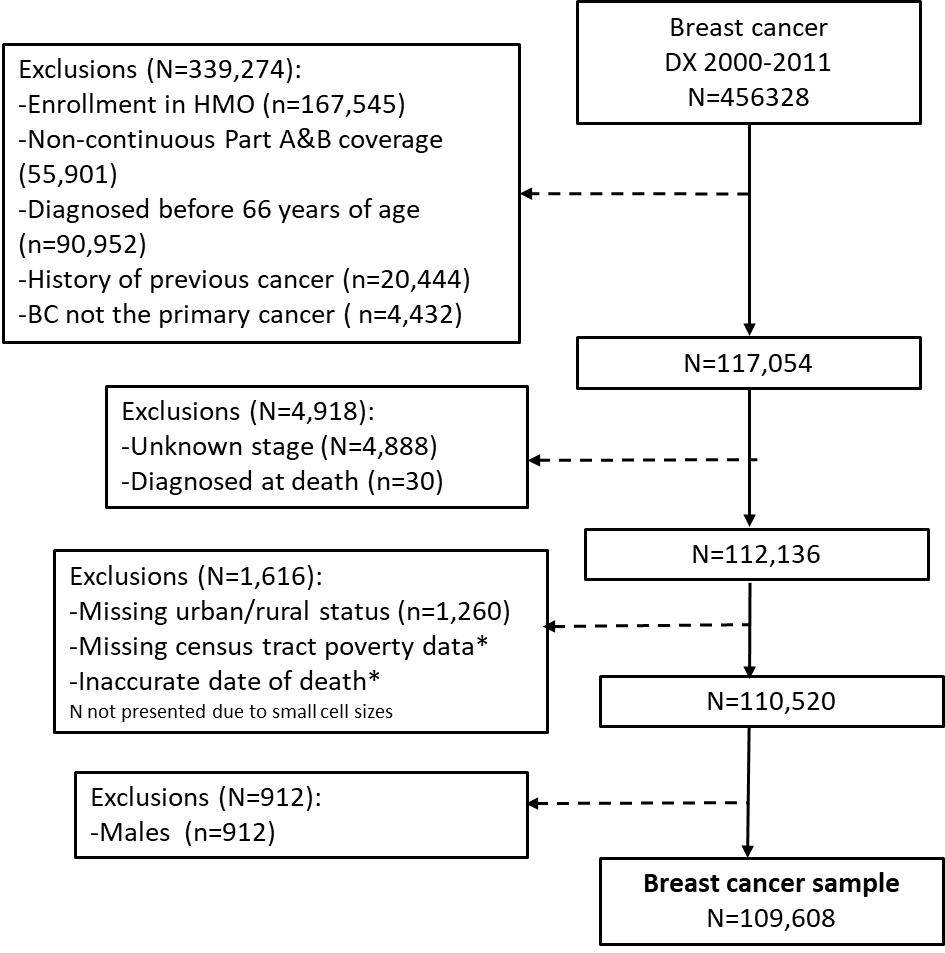

Supplement: 10559965epi191414-sup-232303_3_supp_6220179_q8jj0w.docx [file 10559965epi191414-sup-232303_3_supp_6220179_q8jj0w.docx]
